# Supplementary material for: Engaging Elderly People in Telemedicine Through Gamification
Source: PubMed Central journal article supplement (PMC4704903; doi:10.2196/games.4561), 2015-12-18
Supplement: games_v3i2e9_app1.pdf [file games_v3i2e9_app1.pdf]

**Multimedia Appendix 1.** Keywords first search.

|              |            |             |           |         |
|--------------|------------|-------------|-----------|---------|
| gamification | theory     | method      | criticism | elderly |
| gamif*       | definition | application | downsides | senior  |
| game         | concept    |             | negative  | old*    |
| gaming       | framework  |             |           | aging   |
|              | analysis   |             |           |         |
