# Supplementary material for: Engaging Elderly People in Telemedicine Through Gamification
Source: PubMed Central journal article supplement (PMC4704903; doi:10.2196/games.4561), 2015-12-18
Supplement: games_v3i2e9_app2.pdf [file games_v3i2e9_app2.pdf]

**Multimedia Appendix 2.** Keywords second search.

|        |                |
|--------|----------------|
| user   | type           |
| player | taxonomy       |
| gamer  | classification |
|        | model          |
|        | theory         |
|        | style          |
